# Supplementary material for: Non-thalamic origin of zebrafish sensory relay nucleus: convergent evolution of visual pathways in amniotes and teleosts
Source: bioRxiv or medRxiv preprint supplement (doi:10.1101/2020.05.16.099010), 2020-05-16

## Supplementary file 5

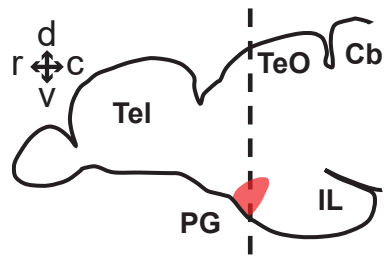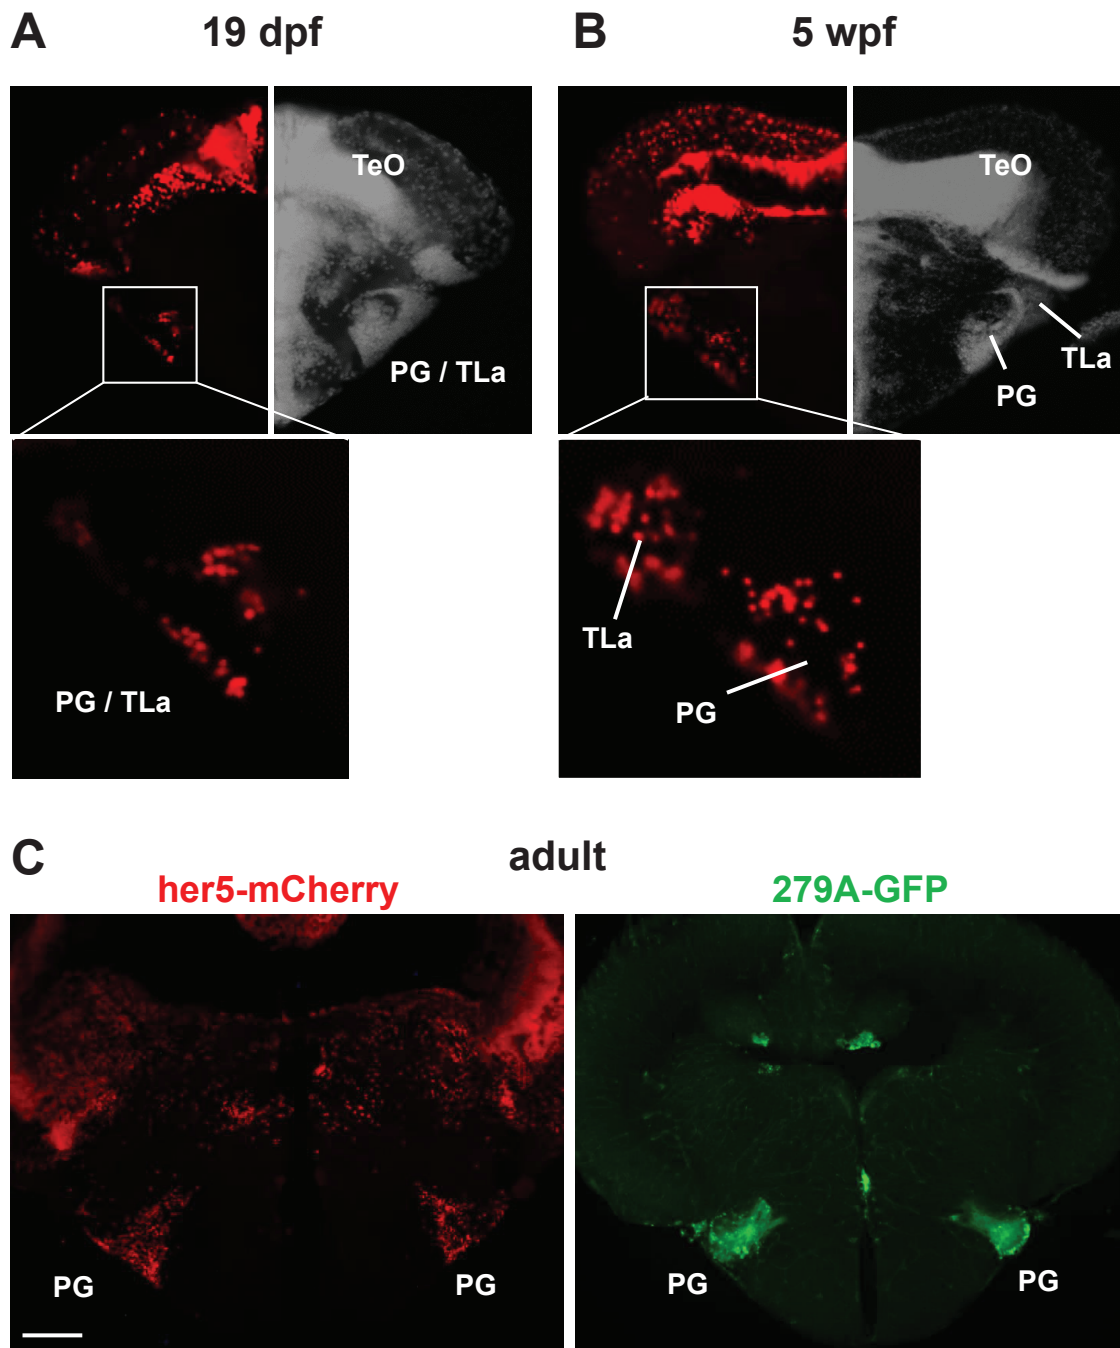

Supplement: Supplementary file [file media-5.pdf]
