# Supplementary material for: Non-thalamic origin of zebrafish sensory relay nucleus: convergent evolution of visual pathways in amniotes and teleosts
Source: bioRxiv or medRxiv preprint supplement (doi:10.1101/2020.05.16.099010), 2020-05-16
Supplement: Supplementary file [file media-9.pdf]

## Supplementary file 9. Conditions of tamoxifen treatments

| age                                                                    |        | tamoxifen treatment |                |                | tamoxifen concentration | age of analysis | # fish analyzed |
|------------------------------------------------------------------------|--------|---------------------|----------------|----------------|-------------------------|-----------------|-----------------|
| start                                                                  | end    | duration per day    | number of days | total duration |                         |                 |                 |
| Tg(her5:ERT2CreERT2; $\beta$ act:lox-stop-lox-hmgb1-mCherry;279A-GFP)  |        |                     |                |                |                         |                 |                 |
| 24 hpf                                                                 | 30 hpf | 6 h                 | 1              | 6 h            | 10 $\mu$ g/mL           | 3 mpf           | 14              |
| Tg(Dr830:ERT2CreERT2; $\beta$ act:lox-stop-lox-hmgb1-mCherry;279A-GFP) |        |                     |                |                |                         |                 |                 |
| 24 hpf                                                                 | 30 hpf | 6 h                 | 1              | 6 h            | 10 $\mu$ g/mL           | 3 mpf           | 3               |
| 24 hpf                                                                 | 30 hpf | 6 h                 | 1              | 6 h            | 10 $\mu$ g/mL           | 6 mpf           | 6               |
| 30 hpf                                                                 | 54 hpf | 24 h                | 1              | 24 h           | 5 $\mu$ g/mL            | 3 mpf           | 6               |
| 48 hpf                                                                 | 54 hpf | 6 h                 | 1              | 6 h            | 10 $\mu$ g/mL           | 3 mpf           | 6               |
| 3 dpf                                                                  | 4 dpf  | 24 h                | 1              | 24 h           | 5 $\mu$ g/mL            | 3 mpf           | 6               |
| 7 dpf                                                                  | 9 dpf  | 4 h                 | 2              | 8 h            | 5 $\mu$ g/mL            | 3 mpf           | 6               |
| 2 wpf                                                                  | 2 wpf  | 2 h                 | 4              | 8 h            | 2 $\mu$ g/mL            | 3 mpf           | 6               |
| 3 wpf                                                                  | 3 wpf  | 2 h                 | 4              | 8 h            | 2 $\mu$ g/mL            | 3 mpf           | 6               |
| 4 wpf                                                                  | 4 wpf  | 2 h                 | 4              | 8 h            | 2 $\mu$ g/mL            | 3 mpf           | 6               |
| 5 wpf                                                                  | 5 wpf  | 2 h                 | 4              | 8 h            | 2 $\mu$ g/mL            | 3 mpf           | 6               |
| 6 wpf                                                                  | 6 wpf  | 4 h                 | 4              | 16 h           | 2 $\mu$ g/mL            | 3 mpf           | 6               |
| 8 wpf                                                                  | 8 wpf  | 4 h                 | 4              | 16 h           | 2 $\mu$ g/mL            | 3 mpf           | 6               |
